# Supplementary material
Source: MDPI journal article supplement (https://www.mdpi.com/2071-1050/14/9/5118)
Supplement: s1 [file s1]

Table S1. Species list.

| ID   | Scientific Name                                  | Family           | Genus                 |
|------|--------------------------------------------------|------------------|-----------------------|
| sp1  | <i>Suaeda salsa</i>                              | Amaranthaceae    | <i>Suaeda</i>         |
| sp2  | <i>Spartina alterniflora</i>                     | Poaceae          | <i>Spartina</i>       |
| sp3  | <i>Setaria viridis</i>                           | Poaceae          | <i>Setaria</i>        |
| sp4  | <i>Phragmites australis</i>                      | Poaceae          | <i>Phragmites</i>     |
| sp5  | <i>Oplismenus undulatifolius</i>                 | Poaceae          | <i>Oplismenus</i>     |
| sp6  | <i>Sonchus wightianus</i>                        | Asteraceae       | <i>Sonchus</i>        |
| sp7  | <i>Erigeron canadensis</i>                       | Asteraceae       | <i>Erigeron</i>       |
| sp8  | <i>Cyclosorus parasiticus</i>                    | Thelypteridaceae | <i>Cyclosorus</i>     |
| sp9  | <i>Cayratia japonica</i>                         | Vitaceae         | <i>Cayratia</i>       |
| sp10 | <i>Eleusine indica</i>                           | Poaceae          | <i>Eleusine</i>       |
| sp11 | <i>Ipomoea purpurea</i>                          | Convolvulaceae   | <i>Ipomoea</i>        |
| sp12 | <i>Symphyotrichum subulatum</i>                  | Asteraceae       | <i>Symphyotrichum</i> |
| sp13 | <i>Cirsium arvense</i> var. <i>integrifolium</i> | Asteraceae       | <i>Cirsium</i>        |
| sp14 | <i>Tripolium pannonicum</i>                      | Asteraceae       | <i>Tripolium</i>      |
| sp15 | <i>Humulus scandens</i>                          | Cannabaceae      | <i>Humulus</i>        |
| sp16 | <i>Festuca elata</i>                             | Poaceae          | <i>Festuca</i>        |
| sp17 | <i>Salicornia europaea</i>                       | Amaranthaceae    | <i>Salicornia</i>     |
| sp18 | <i>Bolboschoenus planiculmis</i>                 | Cyperaceae       | <i>Bolboschoenus</i>  |
| sp19 | <i>Scirpus mariqueter</i>                        | Cyperaceae       | <i>Scirpus</i>        |
| sp20 | <i>Achyranthes bidentata</i>                     | Amaranthaceae    | <i>Achyranthes</i>    |
| sp21 | <i>Sesbania cannabina</i>                        | Fabaceae         | <i>Sesbania</i>       |
| sp22 | <i>Trichosanthes kirilowii</i>                   | Cucurbitaceae    | <i>Trichosanthes</i>  |
| sp23 | <i>Cyperus difformis</i>                         | Cyperaceae       | <i>Cyperus</i>        |
| sp24 | <i>Vicia sepium</i>                              | Fabaceae         | <i>Vicia</i>          |
| sp25 | <i>Paederia cruddasiana</i>                      | Rubiaceae        | <i>Paederia</i>       |
| sp26 | <i>Chenopodium glaucum</i>                       | Amaranthaceae    | <i>Chenopodium</i>    |
| sp27 | <i>Metaplexis japonica</i>                       | Apocynaceae      | <i>Metaplexis</i>     |
| sp28 | <i>Cynodon dactylon</i>                          | Poaceae          | <i>Cynodon</i>        |

|      |                                                    |                |                      |
|------|----------------------------------------------------|----------------|----------------------|
| sp29 | <i>Potentilla freyniana</i>                        | Rosaceae       | <i>Potentilla</i>    |
| sp30 | <i>Inula japonica</i>                              | Asteraceae     | <i>Inula</i>         |
| sp31 | <i>Equisetum ramosissimum</i>                      | Equisetaceae   | <i>Equisetum</i>     |
| sp32 | <i>Helianthus tuberosus</i>                        | Asteraceae     | <i>Helianthus</i>    |
| sp33 | <i>Justicia procumbens</i>                         | Acanthaceae    | <i>Justicia</i>      |
| sp34 | <i>Acalypha australis</i>                          | Euphorbiaceae  | <i>Acalypha</i>      |
| sp35 | <i>Echinochloa crusgalli</i> var. <i>mitis</i>     | Poaceae        | <i>Echinochloa</i>   |
| sp36 | <i>Erigeron bonariensis</i>                        | Asteraceae     | <i>Erigeron</i>      |
| sp37 | <i>Euphorbia helioscopia</i>                       | Euphorbiaceae  | <i>Euphorbia</i>     |
| sp38 | <i>Euphorbia humifusa</i>                          | Euphorbiaceae  | <i>Euphorbia</i>     |
| sp39 | <i>Calamagrostis epigeios</i>                      | Poaceae        | <i>Calamagrostis</i> |
| sp40 | <i>Broussonetia papyrifera</i>                     | Moraceae       | <i>Broussonetia</i>  |
| sp41 | <i>Echinochloa colona</i>                          | Poaceae        | <i>Echinochloa</i>   |
| sp42 | <i>Panicum bisulcatum</i>                          | Poaceae        | <i>Panicum</i>       |
| sp43 | <i>Eclipta prostrata</i>                           | Asteraceae     | <i>Eclipta</i>       |
| sp44 | <i>Miscanthus sinensis</i>                         | Poaceae        | <i>Miscanthus</i>    |
| sp45 | <i>Alternanthera philoxeroides</i>                 | Amaranthaceae  | <i>Alternanthera</i> |
| sp46 | <i>Perilla frutescens</i> var. <i>purpurascens</i> | Lamiaceae      | <i>Perilla</i>       |
| sp47 | <i>Trifolium repens</i>                            | Fabaceae       | <i>Trifolium</i>     |
| sp48 | <i>Melilotus officinalis</i>                       | Fabaceae       | <i>Melilotus</i>     |
| sp49 | <i>Acorus calamus</i>                              | Acoraceae      | <i>Acorus</i>        |
| sp50 | <i>Tamarix chinensis</i>                           | Tamaricaceae   | <i>Tamarix</i>       |
| sp51 | <i>Limonium bicolor</i>                            | Plumbaginaceae | <i>Limonium</i>      |
| sp52 | <i>Amaranthus retroflexus</i>                      | Amaranthaceae  | <i>Amaranthus</i>    |
| sp53 | <i>Commelina benghalensis</i>                      | Commelinaceae  | <i>Commelina</i>     |
| sp54 | <i>Polygonum perfoliatum</i>                       | Polygonaceae   | <i>Polygonum</i>     |
| sp55 | <i>Bidens biternata</i>                            | Asteraceae     | <i>Bidens</i>        |
| sp56 | <i>Capsicum annuum</i>                             | Solanaceae     | <i>Capsicum</i>      |
| sp57 | <i>Apocynum venetum</i>                            | Apocynaceae    | <i>Apocynum</i>      |

|             |                                                  |               |                   |
|-------------|--------------------------------------------------|---------------|-------------------|
| <b>sp58</b> | <i>Portulaca oleracea</i>                        | Portulacaceae | <i>Portulaca</i>  |
| <b>sp59</b> | <i>Polygonum lapathifolium var. salicifolium</i> | Polygonaceae  | <i>Polygonum</i>  |
| <b>sp60</b> | <i>Leptochloa chinensis</i>                      | Poaceae       | <i>Leptochloa</i> |
| <b>sp61</b> | <i>Solanum americanum</i>                        | Solanaceae    | <i>Solanum</i>    |
| <b>sp62</b> | <i>Eragrostis minor</i>                          | Poaceae       | <i>Eragrostis</i> |
| <b>sp63</b> | <i>Geranium carolinianum</i>                     | Geraniaceae   | <i>Geranium</i>   |
| <b>sp64</b> | <i>Paspalum distichum</i>                        | Poaceae       | <i>Paspalum</i>   |
| <b>sp65</b> | <i>Vigna minima</i>                              | Fabaceae      | <i>Vigna</i>      |

**Table S2. Vegetation coverage of the sampling quadrats.**

| Vegetation type  | Subarea |       |       |       |       |       |       |       |       |      |       |
|------------------|---------|-------|-------|-------|-------|-------|-------|-------|-------|------|-------|
|                  | A/60a   | B/44a | C/36a | D/34a | E/19a | F/11a | G/7a  | H/3a  | CK    | CKN  | CKM   |
| Acanthaceae      | —       | 0.22  | —     | —     | —     | —     | —     | —     | —     | —    | —     |
| Acoraceae        | —       | —     | —     | —     | 0.25  | —     | —     | —     | —     | —    | —     |
| Amaranthaceae    | 11.67   | 0.22  | 0.25  | —     | 10.5  | 2.86  | 8.36  | 13.88 | 8.33  | 18   | 12.66 |
| Apocynaceae      | —       | 0.33  | —     | —     | 0.75  | 2.86  | 1.09  | —     | —     | —    | —     |
| Asteraceae       | 0.33    | 10.11 | 8.5   | —     | 13.4  | 5.57  | 7.18  | 16.21 | —     | —    | —     |
| Cannabaceae      | 20      | 1.11  | —     | —     | 2.55  | 4.57  | —     | —     | —     | —    | —     |
| Commelinaceae    | —       | —     | —     | —     | 2.5   | —     | —     | —     | —     | —    | —     |
| Convolvulaceae   | —       | —     | 13.63 | 30    | 4     | —     | —     | —     | —     | —    | —     |
| Cucurbitaceae    | —       | 13    | 1.88  | —     | 3.5   | —     | —     | —     | —     | —    | —     |
| Cyperaceae       | 6.33    | 0.56  | —     | —     | 0.7   | —     | 2.09  | 0.33  | —     | 20.2 | 45.67 |
| Equisetaceae     | —       | —     | —     | —     | 0.3   | —     | —     | —     | —     | —    | —     |
| Euphorbiaceae    | —       | —     | —     | 10    | 0.75  | 1.07  | —     | —     | —     | —    | —     |
| Fabaceae         | —       | 0.11  | 7     | —     | 0.2   | 10.71 | 4.05  | 0.15  | —     | —    | —     |
| Geraniaceae      | —       | —     | —     | 1.33  | —     | —     | —     | —     | —     | —    | —     |
| Lamiaceae        | —       | 0.33  | —     | —     | —     | —     | —     | —     | —     | —    | —     |
| Moraceae         | —       | —     | 0.63  | —     | 0.5   | —     | —     | —     | —     | —    | —     |
| Plumbaginaceae   | —       | —     | —     | —     | —     | —     | 0.91  | —     | —     | —    | —     |
| Poaceae          | 10.33   | 17.44 | 8.13  | 34.67 | 20.1  | 22.57 | 23    | 7.45  | 71.67 | 61.8 | 41.67 |
| Polygonaceae     | —       | —     | —     | —     | 1     | —     | —     | —     | —     | —    | —     |
| Portulacaceae    | —       | 5     | —     | —     | —     | —     | —     | —     | —     | —    | —     |
| Rosaceae         | —       | 0.11  | 0.13  | —     | 0.05  | 0.29  | —     | —     | —     | —    | —     |
| Rubiaceae        | —       | 0.56  | —     | —     | —     | —     | —     | —     | —     | —    | —     |
| Solanaceae       | —       | —     | —     | —     | 0.2   | 0.29  | —     | —     | —     | —    | —     |
| Tamaricaceae     | —       | —     | —     | —     | —     | —     | —     | 0.03  | —     | —    | —     |
| Thelypteridaceae | —       | 11.67 | 0.75  | —     | —     | —     | —     | —     | —     | —    | —     |
| Vitaceae         | 13.33   | —     | 15.63 | 11    | 0.65  | 6.43  | 10.73 | —     | —     | —    | —     |

“—” represent that the vegetation type does not appear in the subarea. The text after “/” for A~H subareas is the reclamation time.
